# Supplementary material
Source: publisher site journal article supplement (https://www.dovepress.com/article/378979)
Supplement: Supplementary file 1 [file get_supplementary_file.php]

**Supplementary table 1** Characteristics at baseline for patients with COPD with and without spirometry data (n=1071)

|  | Patients with a spirometry  n=542 (51%) | Patients without a spirometry  n=529 (49%) | *p-value* |
| --- | --- | --- | --- |
| Sex, n (%)  men  women | 235 (43)  307 (57) | 214 (40)  315 (60) | *0.34* |
| Age-groups in 2005, n (%)  ≤ 60  61-70  >70 | 155 (29)  280 (51)  107 (20) | 117 (22)  263 (50)  149 (28) | *0.002* |
| Education level, n (%)  Low  High | 343 (65)  189 (35) | 377 (73)  140 (27) | *0.34* |
| Level of care, n (%)  Hospital care  Primary care | 227 (42)  315 (58) | 85 (16)  444 (84) | *< 0.001* |
| Heart disease, n (%) | 130 (24) | 132 (25) | *0.71* |
| Depression*,* n (%) | 64 (12) | 63 (12) | *0.96* |
| Diabetes, n (%) | 39 (7) | 36 (12) | *0.009* |
| Hypertension, n (%) | 134 (25) | 160 (30) | *0.04* |
| BMI (n=1053), n (%)  Underweight  normal weight  overweight  obesity | 67 (13)  188 (36)  179 (34)  92 (17) | 48 (9)  177 (35)  177 (35)  108 (21) | *0.21* |
| Current daily smoking | 147 (27) | 159 (30) | *0.29* |
| Exacerbation in the previous six months, n (%) | 204 (38) | 196 (38) | *0.92* |
| mMRC , n (%)  0-1  2  3  4 | 215 (41)  87 (17)  78 (15)  145 (27) | 222 (44)  76 (15)  76(15)  132 (26) | *0.77* |

**Notes:** Exacerbation was defined as an unplanned health care visit or course of oral steroids. **Abbreviations**: SD= standard deviation, BMI=body mass index, mMRC=modified Medical Research Council dyspnea score.

**Supplementary table 2** Associations of comorbid heart disease with all-cause and cause specific hospitalization days per year, hospitalization and mortality in patients with spirometry data (n=542)

|  | Adjusted regression coefficient (95% CI) | *p- value* |
| --- | --- | --- |
| Hospitalization days per year | | |
| All cause | 0.27 (-0.05-0.58) | *0.09* |
| Respiratory | 0.14 (-0.28-0.55) | *0.52* |
| Cardiovascular | 0.57 (0.27-0.86) | *0.03* |
| Other | 0.24 (-0.12-0.60) | *0.18* |
|  | Adjusted hazard ratio (95% CI) | *p-value* |
| Hospitalization | | |
| All cause | 1.30 (1.02-1.64) | *0.03* |
| Respiratory | 1.35 (1.00-1.82) | *0.048* |
| Cardiovascular | 1.98 (1.38-2.84) | *<0.001* |
| Other | 1.19 (0.91-1.55) | *0.19* |
| Mortality | | |
| All cause | 1.74 (1.33-2.29) | *< 0.001* |
| Respiratory | 1.25 (0.80-1.96) | *0.33* |
| Cardiovascular | 4.28 (2.54-7.23) | *<0.001* |
| Other | 1.26 (0.75-2.11) | *0.38* |

**Notes**: Results for comorbid heart disease from linear regression analysis for all-cause and cause-specific hospitalization days per year and Cox regression analysis for all cause and cause-specific hospitalization and mortality. Adjusted for age-group, sex, daily smoking, level of education, BMI group, exacerbations the previous six months, hypertension, diabetes, mMRC and GOLD grade at baseline. **Abbreviations**: CI=confidence interval, BMI=body mass index, mMRC=medical research council dyspnea score.
